2

27 E-mail: dr.purvipurohit@gmail.com

28

29 Word count: manuscript- 4,760 (whole), 2,354 (without title page, abstract, references, tables,  
30 figures and figure legends), abstract- 99, references- 49, tables- 3, figures- 3

31

32 **Funding information:** This study was not funded.

33

34 **Abstract:**

35 Growth Differentiation Factor-15 (GDF-15), though emerged as a novel marker in gynecological  
36 cancers, is yet to be recognized in clinical diagnostics. Eligible studies were sorted from multiple  
37 online databases, namely PubMed, Cochrane, ClinicalTrials.gov, Google Scholar, Web of Science,  
38 Embase, Scopus, LILACS, OpenGrey. From six studies, histopathologically diagnosed cases  
39 without prior treatment, and with diagnostic accuracy data for GDF-15 in gynecological cancers,  
40 were included. Our meta-analysis shows that GDF-15 has pooled diagnostic odds ratio of 12.74 at  
41 80.5% sensitivity and 74.1% specificity, and an AUC of 0.84. Hence, GDF-15 is a potential marker  
42 to differentiate gynecological malignancy from non-malignant tumors.

43

44 **Keywords:** Biostatistics, Cancer Biomarkers, Detection/Diagnosis, Ovarian Cancer, GDF-15, MIC-  
45 1, NAG-1, PLAB, PTGFB

## 46 **1. Introduction**

47 Cancers of the ovary, fallopian tube, body of uterus, cervix, vagina, and vulva come under the broad  
48 heading of cancers of the female reproductive system. They are one of the major causes of cancer-  
49 related mortality, accounting for 13.1% of age-standardized cancer-related deaths in females (1).  
50 The difficulty of detecting cancer in its early stages is the primary factor for poor clinical outcomes  
51 (2). Biomarkers contribute to the management of these cancers by pre-operative differentiation  
52 between benign and malignant pelvic masses, progression of malignancy, monitoring response to  
53 treatment and recurrence, and most importantly, attempting to detect disease at an earlier stage (3).  
54 To date, there are no such biomarkers widely used in clinical settings of gynecological  
55 malignancies.

56 Serum cancer antigen 125 (CA125) has been in use as a biomarker for clinical diagnosis and  
57 monitoring of treatment response in epithelial ovarian carcinoma (EOC), but its sensitivity as an  
58 independent marker is suboptimal in early-stage post-menopausal women (3-5). Endometrial cancer  
59 incidence is on the rise worldwide. Early diagnosis can significantly improve its outcome as 5-year  
60 survival is >90% in early-stage disease. Existing markers (e.g., leptin, adiponectin, and prolactin)  
61 for detection or monitoring are subject to hormonal and metabolic alterations and not unique to  
62 cancer development (6). Also, cervical cancer is one of the leading causes of female cancer-related  
63 mortality. Although the conventional tumor marker, squamous cell carcinoma is a useful prognostic  
64 marker, its role in early diagnosis is limited (7).

65 Human Growth Differentiation Factor-15 (GDF-15), also known as Macrophage Inhibitory  
66 Cytokine (MIC-1), non-steroidal anti-inflammatory drug (NSAID) activated gene (NAG-1),  
67 placental bone morphogenetic protein (PLAB), placental transforming growth factor-beta (PTGFB),  
68 prostate derived factor (PDF), and PL-74 is a member of the Transforming Growth Factor- $\beta$  (TGF-  
69  $\beta$ ) superfamily (8, 9). Under normal conditions, GDF-15 is only found in large amounts in the  
70 placenta (10). It is also a stress-responsive cytokine that is not only highly expressed in  
71 inflammatory conditions but has emerged as a potential marker in cancer diagnosis and progression

72 (9, 11, 12). Recently, several studies have demonstrated it to be involved in different gynecological  
73 malignancies such as EOC (4, 13-16), endometrial carcinoma (17), uterine sarcoma (18), and  
74 cervical cancer (19), where it is seen to be increased in serum or upregulated in tissue in case of  
75 malignant tumors compared to non-malignant ones. Hence, its applicability as a biomarker that can  
76 differentiate a benign mass from a malignant one and aid in the early detection of gynecological  
77 malignancies would be a significant advancement. Recently, Maeno et al. (20) developed a novel,  
78 flow-through membrane immunoassay-based measurement system for GDF-15 for the screening of  
79 uterine sarcoma. This chemiluminescence assay-based method correlated well with the GDF-15  
80 measurements from ELISA (18). Nevertheless, the inconsistency of the data across different studies  
81 prevents us from pinpointing its clinical relevance in these patients. We have compiled original  
82 articles citing the role of GDF-15 in cancers of the female reproductive tract and performed a  
83 systematic analysis to evaluate its importance as a diagnostic biomarker.

## 84 **2. Materials and Methods**

### 85 *2.1 Data sources and eligibility criteria*

86 We conducted this study following the Meta-analysis Of Observational Studies in Epidemiology  
87 (MOOSE) and Preferred Reporting Items for a Systematic Review and Meta-analysis of Diagnostic  
88 Test Accuracy Studies (PRISMA-DTA) guidelines (21, 22). Two independent reviewers performed  
89 a selective literature search on several databases (Pubmed, Cochrane, ClinicalTrials.gov, Google  
90 Scholar, Web of Science, Embase, Scopus, LILACS, Opengrey) during 16<sup>th</sup>-20<sup>th</sup> March 2019. All  
91 relevant articles were screened as per titles and abstracts and subsequently reviewed for eligibility  
92 after they were combined and imported to Rayyan QCRI software (23). MeSH terms or keywords  
93 used in the search were ((“Growth Differentiation Factor-15” OR “GDF-15” OR “Macrophage  
94 Inhibitory Cytokine-1” OR “MIC-1” OR “NSAID-activated gene-1” OR “NAG-1” OR “placental  
95 transforming growth factor-beta” OR “PTGFB” OR “placental bone morphogenetic protein” OR  
96 “PLAB” OR “prostate derived factor” OR “PDF” OR “PL-74”) AND (“Ovarian cancer” OR  
97 “Ovarian carcinoma” OR “Endometrial cancer” OR “Endometrial carcinoma” OR “Uterine cancer”

5

98 OR “Uterine Carcinoma” OR “Cervical cancer” OR “Cervical carcinoma”) AND (“diagnosis” OR  
99 “sensitivity” OR “specificity” OR “prognosis” OR “outcome”). References of identified articles  
100 and related reviews were manually searched for articles that may have been left out. The entire  
101 search strategy was carried out again latest on 3<sup>rd</sup> April 2021 for new articles which may have been  
102 left out of the analyses. No such study was found.

### 103 **2.2 Study selection**

104 The selection procedure is schematically depicted according to the PRISMA 2020 flow diagram  
105 (Figure 1) (24). Full-text studies were included as long as they met the following criteria: (1)  
106 included cases that were first identified without prior treatment; (2) proven diagnosis by pathology;  
107 (3) studies reported diagnostic feature of GDF-15 in cancers of the female reproductive tract; (4)  
108 sufficient data for describing or calculating Sensitivity, Specificity, and Area Under Curve (AUC);  
109 (5) studies approved by an Ethics Committee or Institutional Review Board, i.e. studies must have  
110 mentioned that written informed consent had been taken from all subjects before inclusion.

111 Accordingly, exclusion criteria were- (1) studies in which patient received therapy, (2) studies with  
112 insufficient data, and also, failure to contact the authors, (3) studies with <10 cases, (4) duplicate  
113 publications, (5) non-clinical research, animal studies, reviews, conference abstracts, case reports,  
114 meta-analyses.

115 Registration detail: PROSPERO, CRD42019130097.

### 116 **2.3 Data collection**

117 Data were extracted from articles in the form of the lead author, year of publication, country of the  
118 study population, the number of patients, sample type, method of testing, sensitivity, specificity,  
119 cut-off value, and AUC by two independent reviewers. In the articles where sensitivity and  
120 specificity were not explicitly mentioned, they were extracted from the AUC curve using the  
121 Engauge Digitizer software (25) or manually calculated from other measures of diagnostic accuracy  
122 available in the articles (26) or both. Efforts were made to contact the authors of the original articles  
123 for the missing data but to no avail. In cases where a study had data for multiple comparisons, only

6

124 one comparison was chosen in the final analysis considering the relevance to our research topic,  
125 heterogeneity issues and to avoid a unit-of-analysis error (27). All disagreements were resolved by  
126 discussion or consensus with a third reviewer.

#### 127 ***2.4 Assessment of risk of bias***

128 Quality assessment and risk of bias of the studies were evaluated by the revised Quality Assessment  
129 of Diagnostic Accuracy Studies-2 (QUADAS-2) criteria (28) according to the designated points viz.  
130 patient selection, index test, reference standard, and flow and timing. All relevant evidence were  
131 included in the final analysis (28).

#### 132 ***2.5 Data analysis***

133 Previously published guidelines and methods for conducting a meta-analysis of diagnostic test  
134 accuracy were consulted (29-31). Analyses were performed on Review Manager 5.3 (RevMan 5.3)  
135 (32), R programming platform with the aid of R packages **meta** and **mada** (Meta-Analysis of  
136 Diagnostic Accuracy) (33-37) and the MetaDTA online tool as described by Freeman et al. (38).  
137 The primary outcomes were obtained as pooled sensitivity, specificity, positive likelihood ratio  
138 (PLR), negative likelihood ratio (NLR), diagnostic odds ratio (DOR), and AUC with corresponding  
139 95% confidence intervals (CI) by grouping the data from the studies. The bivariate model (39) for  
140 calculating summary measures in diagnostic accuracy studies was used for the analysis. Statistically  
141 significant heterogeneity among the studies was verified using Cochran's Q and I<sup>2</sup> statistics and a  
142 fixed or random-effects model was chosen accordingly. Funnel plot asymmetry for the examination  
143 of publication bias was not performed as the number of included studies was less than 10 (40).  
144 For all analytical purposes,  $p < 0.05$  was considered statistically significant.

### 145 **3. Results**

#### 146 ***3.1 Study selection***

147 One hundred ninety-six (196), potentially relevant studies were retrieved in our search (Figure 1).  
148 They were scanned for titles, keywords, abstracts, and a total of one hundred eighty-four (184)  
149 studies were eliminated because they were either duplicates, out of scope or basic or animal model

150 studies. The remaining 12 studies were read in detail, and finally, 6 of them, comprising 923 cases  
151 of gynecological cancers and 465 non-cancer controls, were considered eligible for diagnostic meta-  
152 analysis according to our inclusion criteria.

### 153 ***3.2 Study characteristics***

154 The study characteristics are summarized in Table 1. In the six diagnostic studies finally included,  
155 the study participants involved Chinese (4, 15), Polish (13), Norwegian (14, 17, 18), and Belgian  
156 (18) patients, suffering from ovarian carcinoma (4, 13-15), endometrial carcinoma (17), and uterine  
157 sarcoma (18). The final diagnosis was all confirmed histologically and staged according to the  
158 International Federation of Gynecology and Obstetrics (FIGO) staging. The control group was non-  
159 cancer controls and comprised of healthy pre-and post-menopausal controls, benign ovarian tumors,  
160 and benign leiomyoma. Samples were either EDTA plasma (14, 17, 18), serum (4, 15), or peritoneal  
161 fluid (13). Enzyme-linked Immunosorbent Assay (ELISA) was primarily used to measure GDF-15,  
162 while one group each used immunoradiometric assay (IRMA) and multiplex immunoassay (13, 14).  
163 The diagnostic measures were sensitivity, specificity, and AUC. Only three out of the six studies  
164 provided a cut-off value of GDF-15, ranging from 519.6 pg/mL to 748 pg/mL (4, 14, 15).

### 165 ***3.3 Risk of bias of included studies***

166 The studies were assessed for quality using the QUADAS-2 list (Table 3). According to the  
167 QUADAS-2 assessment, five out of six studies were at risk of bias, whereas only one study showed  
168 concern regarding applicability. All studies were included for further statistical analysis.

### 169 ***3.4 Synthesis of results***

170 The Higgins'  $I^2$  for the diagnostic odds ratio of all studies was 86.5% (95% CI 72.8%-93.3%,  
171  $p<0.01$ ), indicating considerable heterogeneity in the pooled data. Values ranging from 60.9% to  
172 90.6% were also detected in other subgroups in the diagnostic data. Hence, we resorted to using the  
173 random-effects model for the studies.

174 The measures of diagnostic accuracy for the included studies are depicted in Table 2 and Figure 2.

175 The overall pooled sensitivity, specificity, diagnostic odds ratio (DOR) and area under the curve

176 (AUC) for GDF-15 used to distinguish gynecological cancers from non-cancerous tumors, were  
177 0.805 (95% CI: 0.711-0.873), 0.741 (95% CI: 0.611-0.839), 12.738 (95% CI: 5.034-32.231), and  
178 0.835 respectively, corresponding to a positive likelihood ratio (PLR) of 3.103 (95% CI: 1.671-  
179 4.535) and a negative likelihood ratio (NLR) of 0.264 (95% CI: 0.146-0.383). The summary ROC  
180 curve is shown in Figure 3. These results suggest that GDF-15 levels can be used as a useful  
181 alternative biomarker in diagnosing cancers of the female reproductive tract compared to non-  
182 cancerous tumors.

#### 183 **4. Discussion**

184 Our study has identified six original articles which evaluated the role of GDF-15 as a candidate  
185 biomarker in diagnosing malignancies of the female reproductive tract from non-malignant tumors.  
186 We performed a meta-analysis and found it to be a potential robust biomarker with a pooled  
187 sensitivity and specificity of 80.5% and 74.1%, respectively. One study (14) had a 'low risk' of bias  
188 and applicability across all domains in the QUADAS-2 assessment. Five other studies had either  
189 'unclear' or 'high' risk of bias in one of the four domains, among which Staff et al. (17) also had one  
190 'unclear' applicability concern. We also found significant heterogeneity across the studies.

191 Malignancies of the female reproductive tract are one of the major causes of cancer-related  
192 mortality in females, mainly because these cancers are diagnosed at later stages (1, 2). Pre-operative  
193 detection of malignant lesions is also crucial for optimal management. Furthermore, the disease-free  
194 survival (DFS) of EOC patients is often poor even after extensive resection (41). Several systematic  
195 reviews in the past have elaborated the role of existing biomarkers or combinations thereof in  
196 ovarian or endometrial cancers alone (42-45). CA125 as a diagnostic biomarker to differentiate  
197 malignant and borderline ovarian tumors from benign lesions showed a promising sensitivity and  
198 specificity of 80% and 75%, respectively (45), which is comparable to our pooled estimates.  
199 Nevertheless, to our knowledge, a marker potent enough to discriminate malignant gynecological  
200 tumors in early stages from non-malignant ones without compromising on either sensitivity or  
201 specificity is not yet described. Several groups have proposed GDF-15 as a biomarker in prostatic,



202 colorectal, hepatocellular, and pancreatic carcinomas as well as other malignancies and non-  
203 malignant inflammatory conditions (46, 47). Therefore, it is clear from the existing evidence that  
204 GDF-15 may not be specific for any single cancer type. However, GDF-15 is substantially  
205 increased or upregulated across all gynecological malignancies. Thus, it can be used as a  
206 complementary diagnostic biomarker in addition to existing diagnosing strategies, wherein it may  
207 be a useful biomarker in the diagnosis of early-stage EOC from benign ovarian tumors and other  
208 non-cancerous tumors of the female reproductive tract in such scenarios. In our study, the pooled  
209 sensitivity was comparably close with the sensitivity values of GDF-15 across all articles which  
210 were taken for analysis. While two articles on ovarian carcinoma showed the specificity of GDF-15  
211 to be below 60% (13, 14), the pooled specificity came out to be 74.1%, possibly because of sizeable  
212 inter-study variation.

213 There are certain limitations to our study. There were low sample sizes for individual cancer types.  
214 Most of the studies were at risk of bias, primarily due to a case-control design, which is known to  
215 exaggerate diagnostic accuracy (48, 49). So far, the studies have been confined only to Chinese and  
216 European populations. Thus, a small sample with such a highly selective population will require  
217 further validation studies to establish its applicability in diagnosis in a clinical setting. Studies on a  
218 large scale need to be carried out in other populations. In our review, we could not include studies  
219 on all the cancers of the female reproductive system, namely cervical and vulval cancers, as data  
220 were either not present or did not fit our inclusion criteria. Furthermore, studies on in-vitro models  
221 and animal models were also left out. Patients with treatment history had to be excluded as anti-  
222 cancer therapy may alter the expression levels of GDF-15.

223 The applicability of GDF-15 can be verified with future prospective studies focusing on larger  
224 sample size and patient ethnicities. Finally, before implementing it into clinical practice, cut-off  
225 values for GDF-15 must be determined and internationally validated. Here, the cut-off value to  
226 differentiate between malignant and non-malignant tumors or healthy controls is mentioned in only  
227 three of the six studies included. Large scale prospective cohorts, then, are necessary to validate a

10

228 uniform cut-off. To summarize, our analysis suggests that GDF-15 may be a useful candidate

229 marker to differentiate malignant from non-malignant tumors of the female reproductive system.

11

230 **Acknowledgement:** None.

231 **Disclosure of interest:** The authors report no conflict of interest.

232 **References:**

- 233 1. Bray, F., Ferlay, J., Soerjomataram, I., Siegel, R. L., Torre, L. A., & Jemal, A. (2018). Global  
234 Cancer Statistics 2018: GLOBOCAN Estimates of Incidence and Mortality Worldwide for 36  
235 Cancers in 185 Countries. *CA Cancer J Clin.* 2018 Nov;68(6):394-424. doi:10.3322/caac.21492
- 236 2. Mishra K. Gynaecological malignancies from palliative care perspective. *Indian J Palliat Care.*  
237 2011;17(Suppl):S45–S51. doi:10.4103/0973-1075.76243
- 238 3. Yang WL, Lu Z, Bast RC Jr. The role of biomarkers in the management of epithelial ovarian  
239 cancer. *Expert Rev Mol Diagn.* 2017;17(6):577–591. doi:10.1080/14737159.2017.1326820
- 240 4. Zhao, D., Wang, X. & Zhang, W. GDF15 predict platinum response during first-line  
241 chemotherapy and can act as a complementary diagnostic serum biomarker with CA125 in  
242 epithelial ovarian cancer. *BMC Cancer* 18, 328 (2018) doi:10.1186/s12885-018-4246-4
- 243 5. E. Hogdall. Cancer antigen 125 and prognosis, *Curr. Opin. Obstet. Gynecol.* 20 (1) (2008) 4–8.
- 244 6. Townsend MH, Ence ZE, Felsted AM, Parker AC, Piccolo SR, Robison RA, O'Neill KL.  
245 Potential new biomarkers for endometrial cancer. *Cancer Cell Int.* 2019;19:19. Published 2019  
246 Jan 21. doi:10.1186/s12935-019-0731-3
- 247 7. Iida, M., Banno, K., Yanokura, M., Nakamura, K., Adachi, M., Nogami, Y., Umene, K.,  
248 Masuda, K., Kisu, I., Iwata, T., et al. (2014). Candidate biomarkers for cervical cancer  
249 treatment: Potential for clinical practice (Review). *Mol Clin Oncol.* 2, 647-655.  
250 doi:10.3892/mco.2014.324
- 251 8. Bootcov MR, Bauskin AR, Valenzuela SM, et al. MIC-1, a novel macrophage inhibitory  
252 cytokine, is a divergent member of the TGF-beta superfamily. *Proc Natl Acad Sci U S A.*  
253 1997;94:11514–9.
- 254 9. Adela R, Banerjee SK. GDF-15 as a target and biomarker for diabetes and cardiovascular  
255 diseases: a translational prospective. *J Diabetes Res.* 2015; 2015:490842.
- 256 10. Lawton LN, Bonaldo MF, Jelenc PC, Qiu L, Baumes SA, Marcelino RA, de Jesus GM,  
257 Wellington S, Knowles JA, Warburton D, et al. Identification of a novel member of the TGF-

- 258 beta superfamily highly expressed in human placenta. *Gene* 1997;1:17–26. doi: 10.1016/s0378-
- 259 1119(97)00485-x
- 260 11. Modi, A., Dwivedi, S., Roy, D., Khokhar, M., Purohit, P., Vishnoi, J., Pareek, P., Sharma, S.,
- 261 Sharma, P., Misra, S. (2019). Growth differentiation factor 15 and its role in carcinogenesis: an
- 262 update. *Growth Factors*, 2019 Aug;37(3-4):190-207. doi:10.1080/08977194.2019.1685988
- 263 12. Modi A, Roy D, Purohit P, Pareek P, Vishnoi J. Analysis of Serum Growth Differentiation
- 264 Factor-15 in Progression of Breast Cancer in Type II Diabetes Mellitus Patients. *Metabolism*.
- 265 March 2021; 116(Suppl):154538. doi:10.1016/j.metabol.2020.154538.
- 266 13. Chudecka-Głaz AM, Cymbaluk-Płoska AA, Menkiszak JL, Pius-Sadowska E, Machaliński BB,
- 267 Sompolska-Rzechuła A, Rzepka-Górska IA. Assessment of selected cytokines, proteins, and
- 268 growth factors in the peritoneal fluid of patients with ovarian cancer and benign gynecological
- 269 conditions. *Onco Targets Ther.* 2015 Feb 23;8:471-485. doi: 10.2147/OTT.S73438.
- 270 14. Staff, A. C., Bock, A. J., Becker, C., Kempf, T., Wollert, K. C., & Davidson, B. (2010). Growth
- 271 differentiation factor-15 as a prognostic biomarker in ovarian cancer. *Gynecol Oncol*, 118(3),
- 272 237–243. doi:10.1016/j.ygyno.2010.05.032
- 273 15. Zhang Y, Hua W, Niu LC, Li SM, Wang YM, Shang L, Zhang C, Li WN, Wang R, Chen BL,
- 274 et al. Elevated growth differentiation factor 15 expression predicts poor prognosis in epithelial
- 275 ovarian cancer patients. *Tumour Biol.* 2016 Jul;37(7):9423-9431. doi: 10.1007/s13277-015-
- 276 4699-x.
- 277 16. Lima CA, Jammal MP, Martins-Filho A, Silveira TP, Micheli DC, Tavares-Murta BM, Murta
- 278 EFC, Nomelini RS. Stromal Growth Differentiation Factor 15 and Its Association with Ovarian
- 279 Cancer. *Gynecol Obstet Invest.* 2018;83(1):35-39. doi: 10.1159/000473891.
- 280 17. Staff AC, Trovik J, Eriksson AG, Wik E, Wollert KC, Kempf T, Salvesen HB. Elevated plasma
- 281 growth differentiation factor-15 correlates with lymph node metastases and poor survival in
- 282 endometrial cancer. *Clin Cancer Res.* 2011 Jul 15;17(14):4825-4833. doi:10.1158/1078-
- 283 0432.CCR-11-0715.

- 284 18. Trovik, J., Salvesen, H. B., Cuppens, T., Amant, F., & Staff, A. C. (2014). Growth  
285 Differentiation Factor-15 as Biomarker in Uterine Sarcomas. *Int J of Gynecol Cancer*, 24(2),  
286 252–259. doi:10.1097/igc.0000000000000037
- 287 19. Li S, Ma YM, Zheng PS, Zhang P. (2018). GDF15 promotes the proliferation of cervical cancer  
288 cells by phosphorylating AKT1 and Erk1/2 through the receptor ErbB2. *J Exp Clin Cancer Res*,  
289 37(1):80. doi:10.1186/s13046-018-0744-0
- 290 20. Maeno M, Mizutani T, Tsuyoshi H, Yamada S, Ishikane S, Kawabe S, Nishimura K, Yamada  
291 M, Miyamoto K, Yoshida Y. Development of a novel and rapid measurement system for  
292 growth differentiation factor-15, progranulin, and osteopontin in uterine sarcoma. *Endocr J*.  
293 2020 Jan 28;67(1):91-94. doi: 10.1507/endocrj.EJ18-0572.
- 294 21. Stroup DF, Berlin JA, Morton SC, Olkin I, Williamson GD, Rennie D. Meta-analysis of  
295 observational studies in epidemiology: a proposal for reporting. Meta-analysis of Observational  
296 Studies in Epidemiology (MOOSE) group. *JAMA* 2000;283: 2008–2012.
- 297 22. McInnes MDF, Moher D, Thombs BD, McGrath TA, Bossuyt PM, The PRISMA-DTA Group  
298 (2018). Preferred Reporting Items for a Systematic Review and Meta-analysis of Diagnostic  
299 Test Accuracy Studies: The PRISMA-DTA Statement. *JAMA*. 2018 Jan 23;319(4):388-396.  
300 doi: 10.1001/jama.2017.19163.
- 301 23. Ouzzani M, Hammady H, Fedorowicz Z, Elmagarmid A. Rayyan-a web and mobile app for  
302 systematic reviews. *Syst Rev*. 2016 Dec 5;5(1):210. doi: 10.1186/s13643-016-0384-4.
- 303 24. Page MJ, McKenzie JE, Bossuyt PM, Boutron I, Hoffmann TC, Mulrow CD, Shamseer L,  
304 Tetzlaff JM, Akl EA, Brennan SE, et al. The PRISMA 2020 statement: an updated guideline for  
305 reporting systematic reviews. *BMJ* 2021;372:n71. doi: 10.1136/bmj.n71
- 306 25. Mark Mitchell, Baurzhan Muftakhidinov and Tobias Winchen et al, "Engauge Digitizer  
307 Software." Webpage: <http://markumitchell.github.io/engauge-digitizer>, Last Accessed: April  
308 3, 2021

- 309 26. Šimundić A. M. (2009). Measures of Diagnostic Accuracy: Basic Definitions. *EJIFCC*, 19(4),  
310 203–211.
- 311 27. Higgins JPT, Thomas J, Chandler J, Cumpston M, Li T, Page MJ, Welch VA (editors).  
312 *Cochrane Handbook for Systematic Reviews of Interventions* version 6.0 (updated July 2019).  
313 Cochrane, 2019. Available from [www.training.cochrane.org/handbook](http://www.training.cochrane.org/handbook).
- 314 28. Whiting PF, Rutjes AW, Westwood ME, Mallett S, Deeks JJ, Reitsma JB, Leeflang MM,  
315 Sterne JA, Bossuyt PM; QUADAS-2 Group. QUADAS-2: a revised tool for the quality  
316 assessment of diagnostic accuracy studies. *Ann Intern Med*. 2011 Oct 18;155(8):529-536. doi:  
317 10.7326/0003-4819-155-8-201110180-00009.
- 318 29. Campbell JM, Klugar M, Ding S, Carmody DP, Hakonsen SJ, Jadotte YT, White S, Munn Z.  
319 Diagnostic test accuracy: methods for systematic review and meta-analysis. *Int J Evid Based*  
320 *Healthc*. 2015 Sep;13(3):154-62. doi: 10.1097/XEB.0000000000000061.
- 321 30. Deville WL, Buntinx F, Bouter LM, Montori VM, de Vet HC, van der Windt DA, Bezemer PD.  
322 Conducting systematic reviews of diagnostic studies: didactic guidelines. *BMC Med Res*  
323 *Methodol* 2002;2:9. doi:10.1186/1471-2288-2-9.
- 324 31. Chappell FM, Raab GM, Wardlaw JM. When are summary ROC curves appropriate for  
325 diagnostic meta-analyses? *Stat Med* 2009; 28:2653–2668.
- 326 32. Review Manager Web (RevMan Web). The Cochrane Collaboration, 2019. Available at  
327 [revman.cochrane.org](http://revman.cochrane.org)
- 328 33. R Core Team (2013). R: A language and environment for statistical computing. R Foundation  
329 for Statistical Computing, Vienna, Austria. URL <http://www.R-project.org/>.
- 330 34. RStudio Team (2015). RStudio: Integrated Development for R. RStudio, Inc., Boston, MA  
331 URL <http://www.rstudio.com/>.
- 332 35. Shim SR, Kim SJ, Lee J. Diagnostic test accuracy: application and practice using R software.  
333 *Epidemiol Health*. 2019;41:e2019007. doi:10.4178/epih.e2019007

- 334 36. Philipp Doebler (2019). mada: Meta-Analysis of Diagnostic Accuracy. R package version 0.5.9.  
335 <https://CRAN.R-project.org/package=mada>
- 336 37. Guido Schwarzer (2007), meta: An R package for meta-analysis, *R News*, 7(3), 40-45.
- 337 38. Freeman SC, Kerby CR, Patel A, Cooper NJ, Quinn T, & Sutton AJ. (2019). Development of  
338 an interactive web-based tool to conduct and interrogate meta-analysis of diagnostic test  
339 accuracy studies: MetaDTA. *BMC Med Res Methodol*, 19(1):81. doi:10.1186/s12874-019-  
340 0724-x
- 341 39. Reitsma JB, Glas AS, Rutjes AWS, Scholten RJPM, Bossuyt PM, & Zwinderman AH.  
342 (2005). Bivariate analysis of sensitivity and specificity produces informative summary  
343 measures in diagnostic reviews. *J Clin Epidemiol*, 58(10), 982-  
344 990. doi:10.1016/j.jclinepi.2005.02.022
- 345 40. Mavridis D, Salanti G. How to assess publication bias: funnel plot, trim-and-fill method and  
346 selection models. *Evid Based Ment Health*. 2014 Feb;17(1):30. doi: 10.1136/eb-2013-101699.  
347 PMID: 24477535
- 348 41. Becker DA, Thomas ED, Gilbert AL, Boone JD, Straughn JM Jr, Huh WK, Bevis KS, Leath  
349 CA 3rd, Alvarez RD. Improved outcomes with dose-dense paclitaxel-based neoadjuvant  
350 chemotherapy in advanced epithelial ovarian carcinoma. *Gynecol Oncol*. 2016;142(1):25-29.
- 351 42. Lan Z, Fu D, Yu X, & Xi M. (2015). Diagnostic values of osteopontin combined with CA125  
352 for ovarian cancer: a meta-analysis. *Familial Cancer*, 15(2), 221-230. doi:10.1007/s10689-015-  
353 9847-3
- 354 43. Hu, L., Du, S., Guo, W., Chen, D., & Li, Y. (2016). Comparison of Serum Human Epididymis  
355 Protein 4 and Carbohydrate Antigen 125 as Markers in Endometrial Cancer. *Int J Gynecol*  
356 *Cancer*, 26(2), 331-340. doi:10.1097/igc.0000000000000621
- 357 44. Wang, J., Gao, J., Yao, H., Wu, Z., Wang, M., & Qi, J. (2014). Diagnostic accuracy of serum  
358 HE4, CA125 and ROMA in patients with ovarian cancer: a meta-analysis. *Tumor Biol*, 35(6),  
359 6127-6138. doi:10.1007/s13277-014-1811-6



- 360 45. Medeiros, L. R., Rosa, D. D., da Rosa, M. I., & Bozzetti, M. C. (2009). Accuracy of CA 125 in  
361 the diagnosis of ovarian tumors: A quantitative systematic review. *Euro J Obstet Gynecol*  
362 *Reprod Biol*, 142(2), 99–105. doi:10.1016/j.ejogrb.2008.08.011
- 363 46. Wang Y, Jiang T, Jiang M, Gu S. Appraising growth differentiation factor 15 as a promising  
364 biomarker in digestive system tumors: a meta-analysis. *BMC Cancer*. 2019 Feb 26;19(1):177.  
365 doi: 10.1186/s12885-019-5385-y.
- 366 47. Roy D, Purohit P, Modi A, Khokhar M, Shukla RKG, Chaudhary R, Sankanagoudar S, Sharma  
367 P. Growth Differentiation Factor-15 as a Biomarker of Obese Pre-diabetes and Type 2 Diabetes  
368 Mellitus in Indian Subjects: A Case-control Study. *Curr Diabetes Rev*. 2021 Jan 3. doi:  
369 10.2174/1573399817666210104101739. Epub ahead of print. PMID: 33397240.
- 370 48. Lijmer JG, Mol BW, Heisterkamp S, Bossel GJ, Prins MH, van der Meulen JH, Bossuyt PM.  
371 Empirical evidence of design-related bias in studies of diagnostic tests. *JAMA*. 1999 Sep  
372 15;282(11):1061-6. doi: 10.1001/jama.282.11.1061. Erratum in: *JAMA* 2000 Apr  
373 19;283(15):1963. PMID: 10493205.
- 374 49. Whiting P, Rutjes AW, Reitsma JB, Glas AS, Bossuyt PM, Kleijnen J. Sources of variation and  
375 bias in studies of diagnostic accuracy: a systematic review. *Ann Intern Med*. 2004 Feb  
376 3;140(3):189-202. doi: 10.7326/0003-4819-140-3-200402030-00010. PMID: 14757617.

377 **Table 1:** Study characteristics of all the articles included in the diagnostic meta-analysis

| Study                   | Country and recruitment period           | Design                   | Group1 (N1)                        | Group2 (N2)                                | Method                      | Cut-off (pg/mL) | TP  | FN  | FP | TN  | Staging                     | Index test | Reference test |
|-------------------------|------------------------------------------|--------------------------|------------------------------------|--------------------------------------------|-----------------------------|-----------------|-----|-----|----|-----|-----------------------------|------------|----------------|
| Staff 2010 (14)         | Norway ; 2003-2009                       | Prospective              | Ovarian carcinoma (125)            | Borderline and benign ovarian tumors (187) | EDTA Plasma; IRMA           | 736             | 100 | 25  | 79 | 108 | 25/11/71/18                 | GDF-15     | FIGO           |
| Zhao 2018 (4)           | China; 2009-2013                         | Retrospective            | Epithelial ovarian carcinoma (122) | Healthy control (120)                      | Serum; ELISA                | 519.6           | 104 | 18  | 14 | 106 | I & II = 13; III & IV = 109 | GDF-15     | FIGO           |
| Zhang 2016 (15)         | China; 2010-2013                         | Retrospective            | Epithelial ovarian carcinoma (120) | Healthy control (40)                       | Serum; ELISA                | 748             | 91  | 29  | 7  | 33  | I & II = 41; III & IV = 104 | GDF-15     | FIGO           |
| Trovik 2014 (18)        | Multicenter (Norway, Belgium); 2001-2010 | Prospective case control | Uterine sarcoma (19)               | Benign leiomyoma (50)                      | EDTA Plasma; ELISA          | -               | 16  | 3   | 6  | 34  | 9/3/3/4                     | GDF-15     | FIGO           |
| Staff 2011 (17)         | Norway ; 2003-2009                       | Nested case control      | Endometrial carcinoma (510)        | Healthy control (40)                       | EDTA Plasma; ELISA          | -               | 319 | 182 | 18 | 32  | 366/57/63/24                | GDF-15     | FIGO           |
| Chudecka-Glaz 2015 (13) | Poland; NR                               | Retrospective            | Ovarian carcinoma (36)             | Benign tumors (38)                         | Peritoneal fluid; Multiplex | -               | 34  | 2   | 17 | 21  | I & II = 10; III & IV = 26  | GDF-15     | FIGO           |

378 *Abbreviations:* CA125 = Cancer Antigen 125; ELISA = enzyme linked immunosorbent assay;  
 379 FIGO = International Federation of Gynecology and Obstetrics; GDF-15 = Growth Differentiation  
 380 Factor-15; IHC = Immunohistochemistry; IRMA = Immunoradiometric assay; NR = not reported

381 **Table 2:** Measures of diagnostic accuracy in the selected studies

| Study                   | Sensitivity (95% CI) | Specificity (95% CI) | DOR (95% CI)         | AUC   |
|-------------------------|----------------------|----------------------|----------------------|-------|
| Staff 2010 (14)         | 0.800 (0.719; 0.866) | 0.578 (0.503; 0.649) | 5.47 (3.23; 9.25)    | 0.790 |
| Zhao 2018 (4)           | 0.853 (0.777; 0.910) | 0.883 (0.812; 0.935) | 43.75 (20.69; 92.52) | 0.913 |
| Zhang 2016 (15)         | 0.758 (0.672; 0.832) | 0.825 (0.672; 0.927) | 14.79 (5.92; 36.99)  | 0.894 |
| Trovik 2014 (18)        | 0.842 (0.604; 0.966) | 0.850 (0.702; 0.943) | 30.22 (6.69; 136.52) | 0.710 |
| Staff 2011 (17)         | 0.637 (0.593; 0.679) | 0.640 (0.492; 0.771) | 3.12 (1.70; 5.71)    | 0.860 |
| Chudecka-Glaz 2015 (13) | 0.944 (0.813; 0.993) | 0.553 (0.383; 0.714) | 21.00 (4.40; 100.22) | 0.752 |
| Pooled data             | 0.805 (0.711; 0.873) | 0.741 (0.611; 0.839) | 12.74 (5.03; 32.23)  | 0.835 |

382

383 *Abbreviations:* 95% CI = 95% Confidence Interval; AUC = Area under the curve; DOR =

384 Diagnostic odds ratio

385 **Table 3:** Evaluation of the risk of bias and applicability concerns of the included diagnostic studies  
386 using QUADAS-2

| Study                   | Risk of Bias      |            |                    |                 | Applicability Concerns |            |                    |
|-------------------------|-------------------|------------|--------------------|-----------------|------------------------|------------|--------------------|
|                         | Patient Selection | Index Test | Reference Standard | Flow and Timing | Patient Selection      | Index Test | Reference Standard |
| Staff 2010 (14)         | Low               | Low        | Low                | Low             | Low                    | Low        | Low                |
| Zhao 2018 (4)           | High              | Low        | Low                | Low             | Low                    | Low        | Low                |
| Zhang 2016 (15)         | High              | Unclear    | Low                | Low             | Low                    | Low        | Low                |
| Trovik 2014 (18)        | Unclear           | Low        | Low                | Low             | Low                    | Low        | Low                |
| Staff 2011 (17)         | High              | Low        | Low                | Low             | Low                    | Unclear    | Low                |
| Chudecka-Glaz 2015 (13) | Low               | Unclear    | Low                | Low             | Low                    | Low        | Low                |

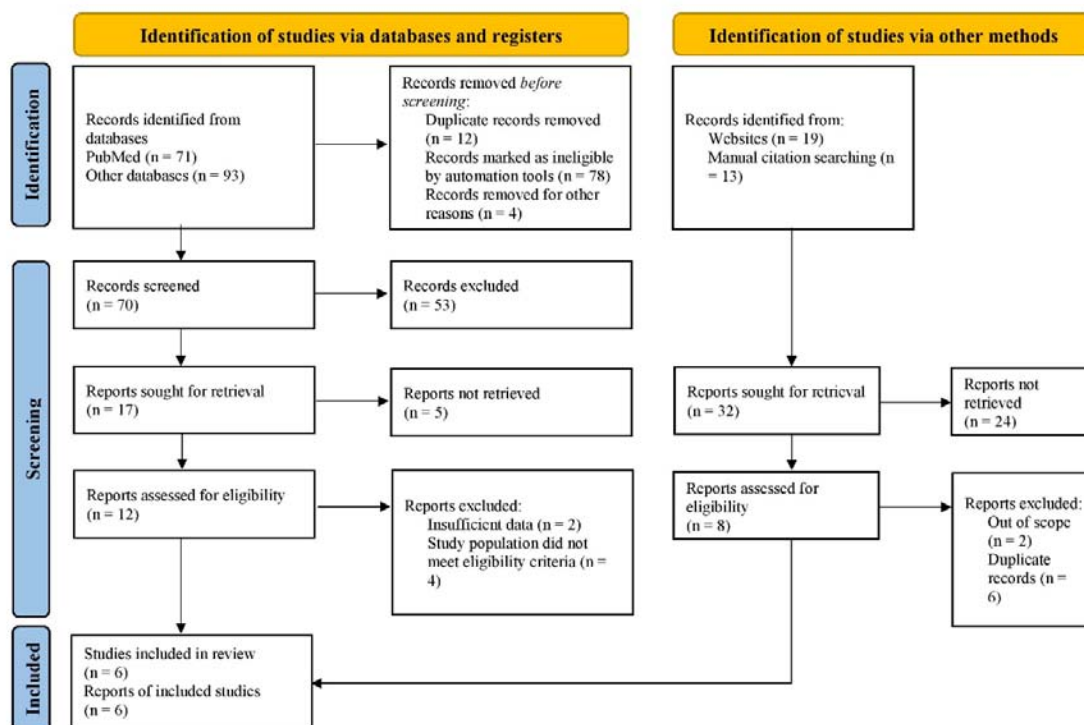

387  
388

**Figure 1:** PRISMA 2020 flow diagram depicting the study selection procedure

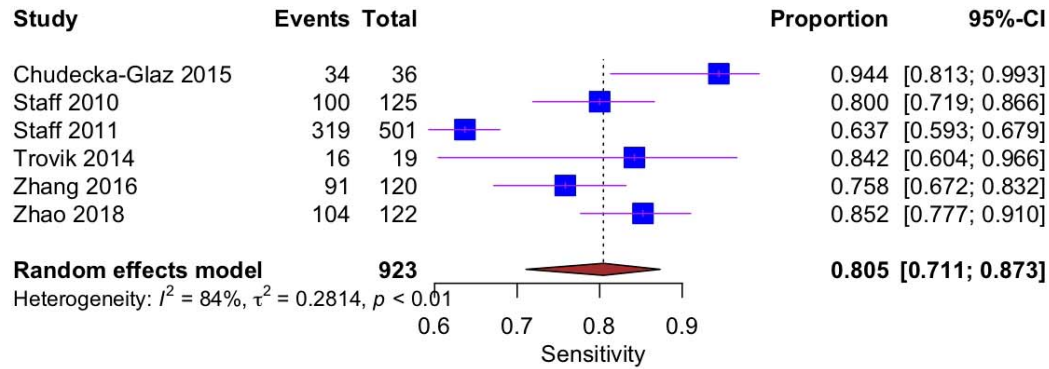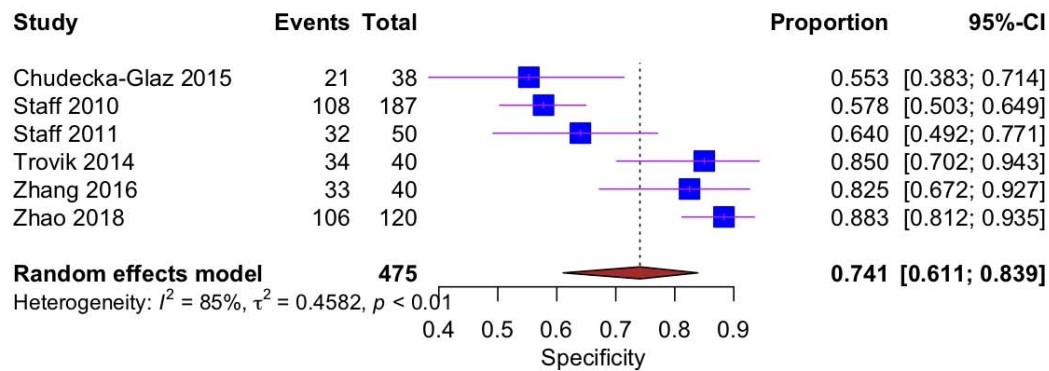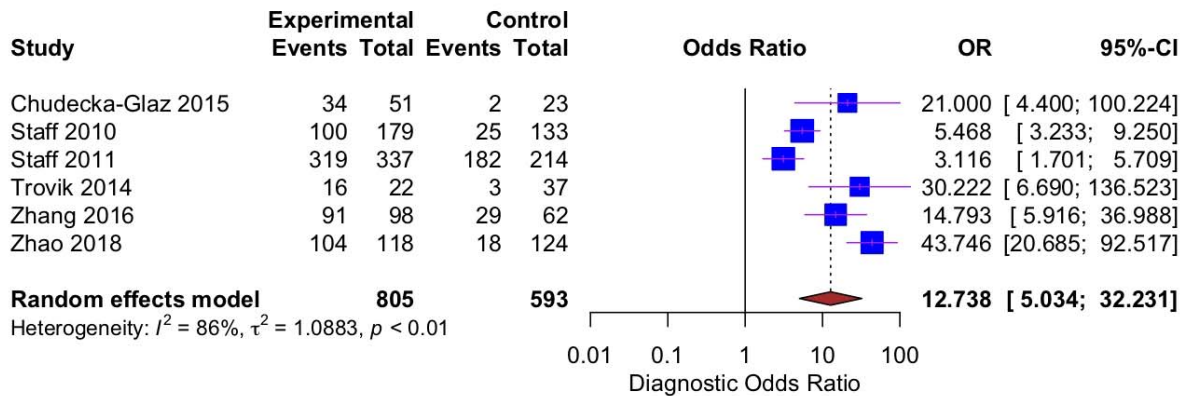

389 **Figure 2:** Forest plots of GDF-15 for the (a) sensitivity, (b) specificity, and (c) diagnostic odds ratio  
 390 of the pooled data from the included studies

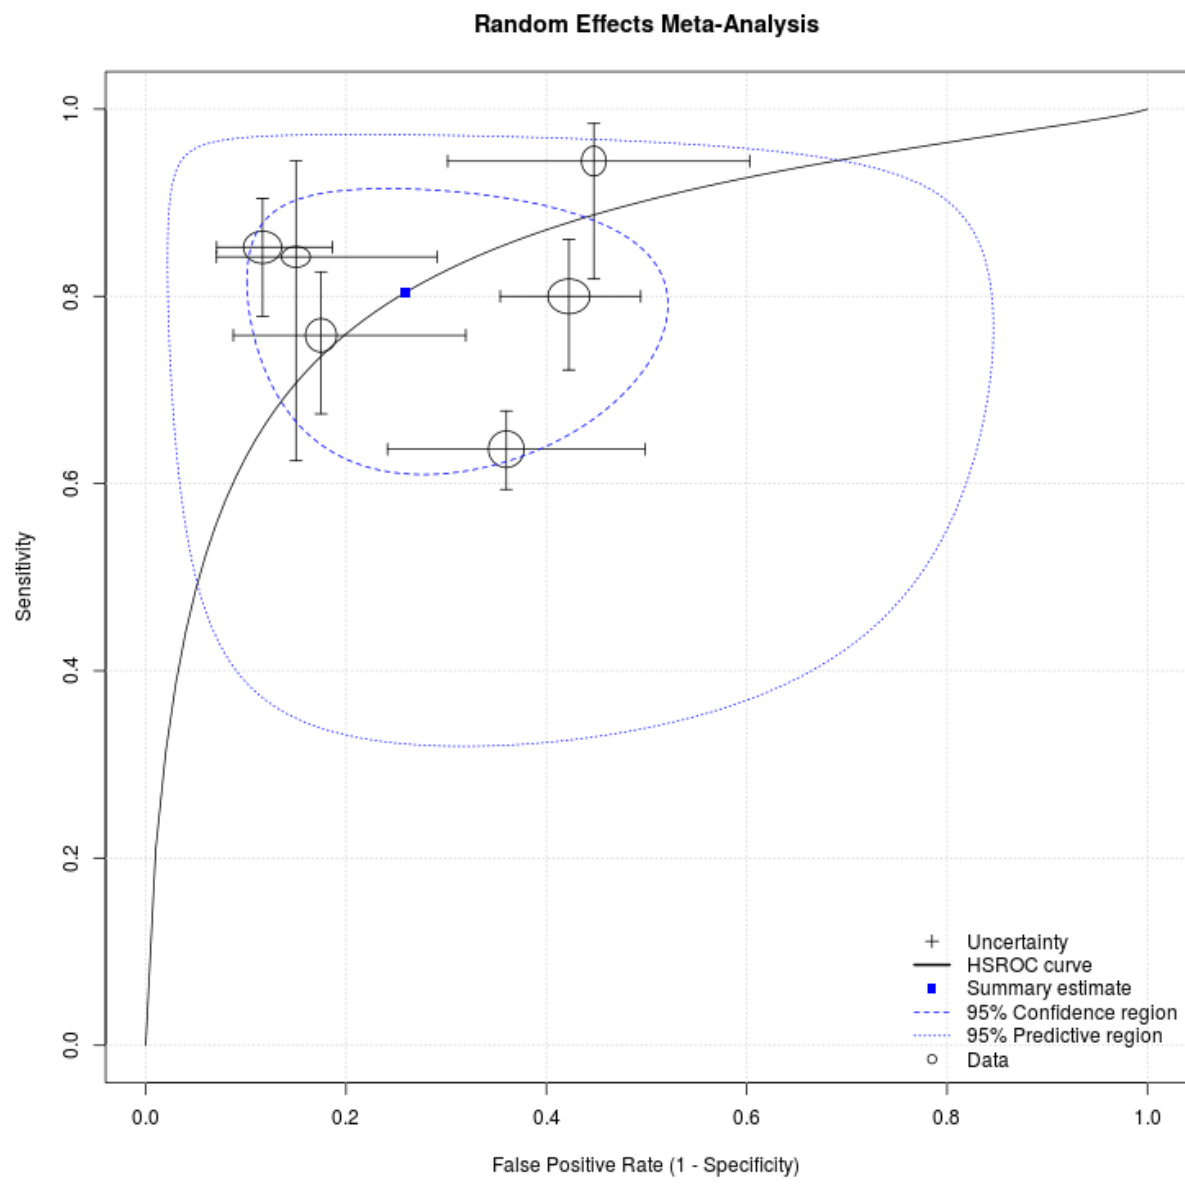

391 **Figure 3:** ROC plot displaying extrapolated SROC curve, the summary estimate for sensitivity and  
392 specificity, and percentage study weights

393 **Figure legends**

394 **Figure 1:** PRISMA 2020 flow diagram depicting the study selection procedure

395 **Figure 2:** Forest plots of GDF-15 for the (a) sensitivity, (b) specificity, and (c) diagnostic odds ratio  
396 of the pooled data from the included studies

397 **Figure 3:** ROC plot displaying extrapolated SROC curve, the summary estimate for sensitivity and  
398 specificity, and percentage study weights
